# Supplementary material for: Insights into the mechanism of interaction between trehalose-conjugated beta-sheet breaker peptides and Aβ(1–42) fibrils by molecular dynamics simulations
Source: Royal Society of Chemistry journal article supplement (doi:10.1039/c3mb70235a), 2013-08-14
Supplement: c3mb70235a.pdf [file c3mb70235a.pdf]

## Supplementary Material

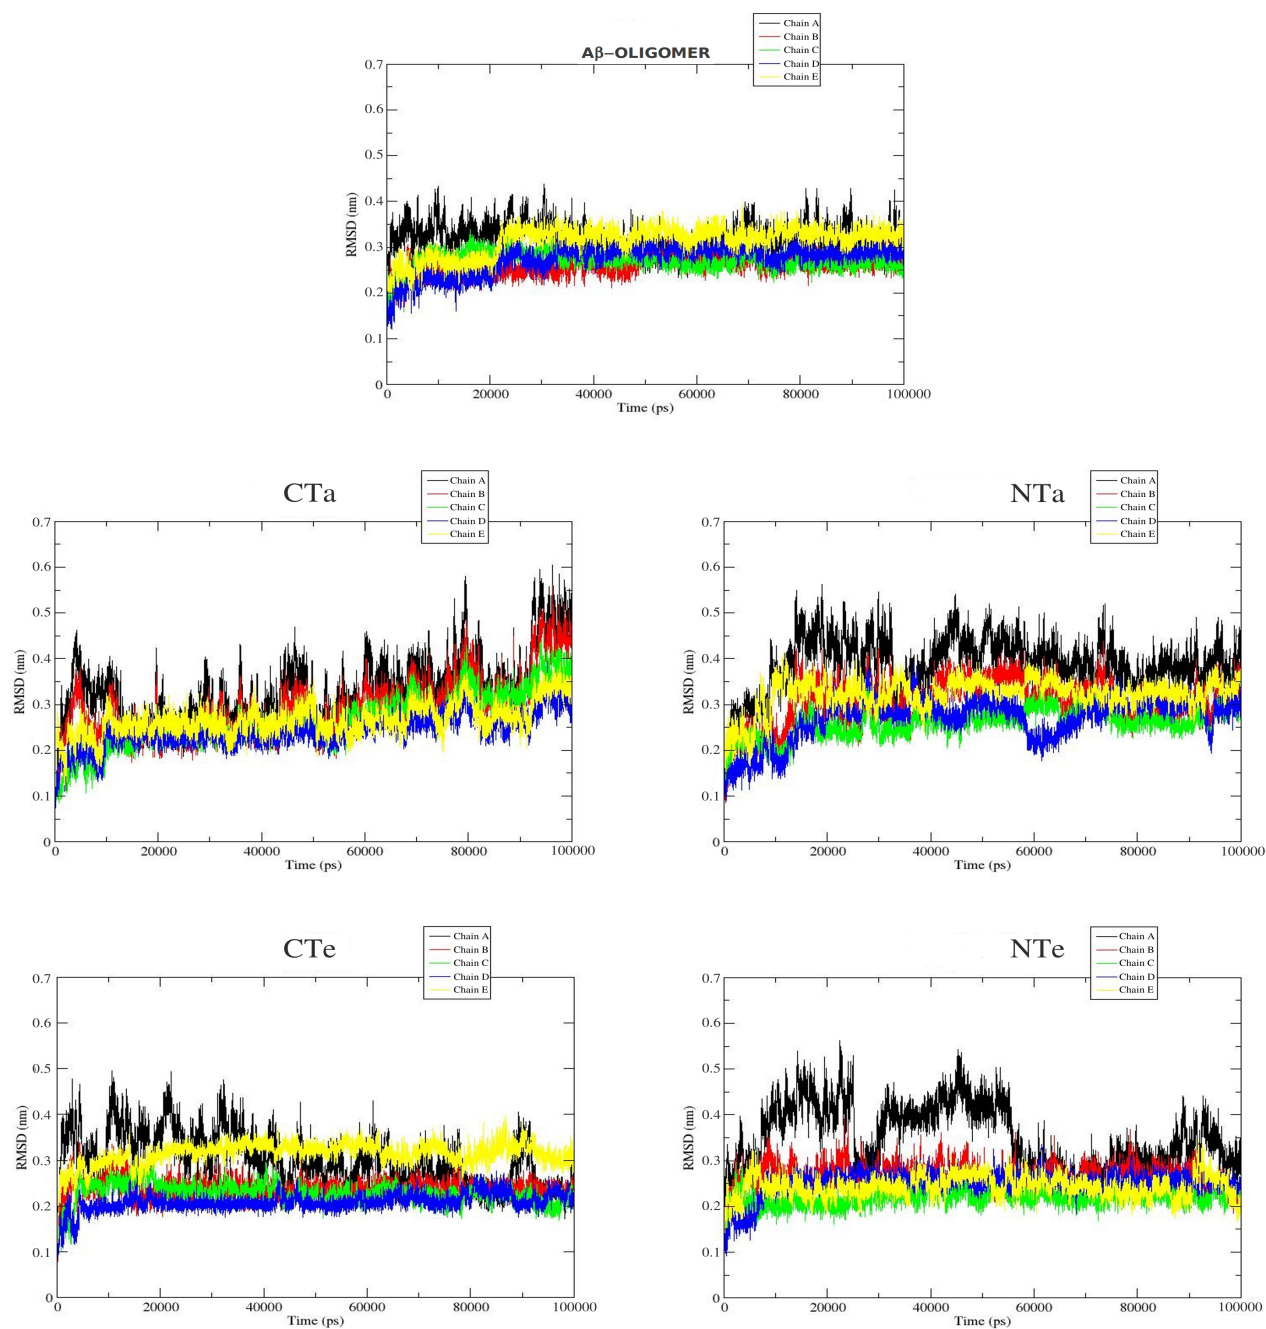

**Figure S1:** Root mean-square deviation of the C $\alpha$  carbon atom positions in all the systems as a function of time, computed per chains.

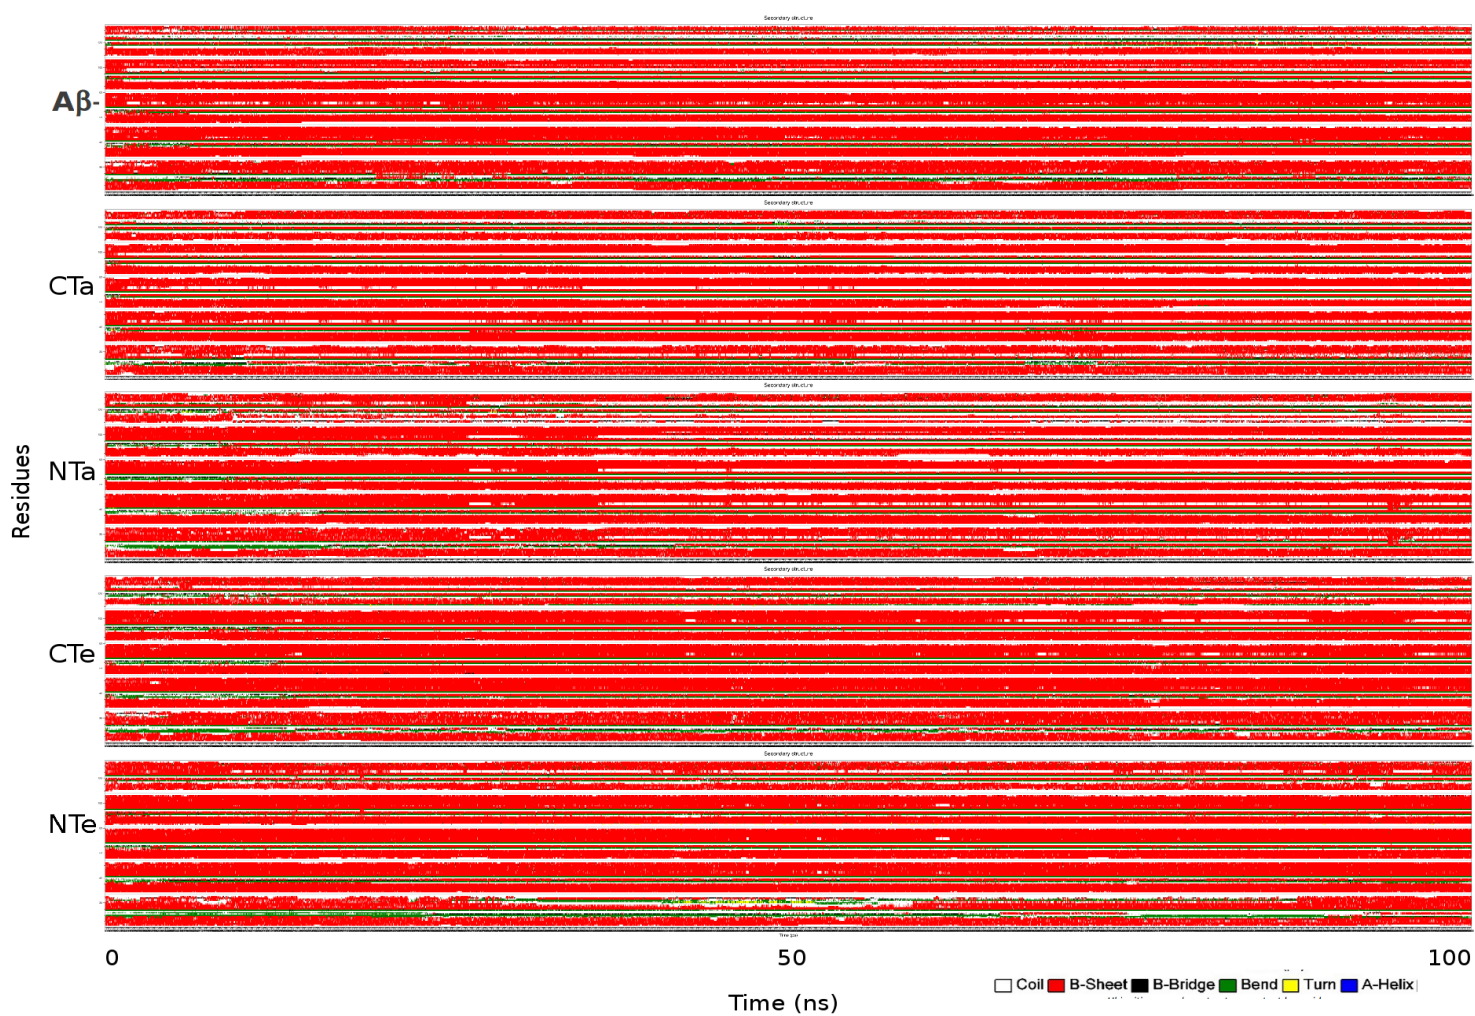

**Figure S2:** Secondary structures as function of time for each systems, indicated by the labels, as calculated by DSSP.

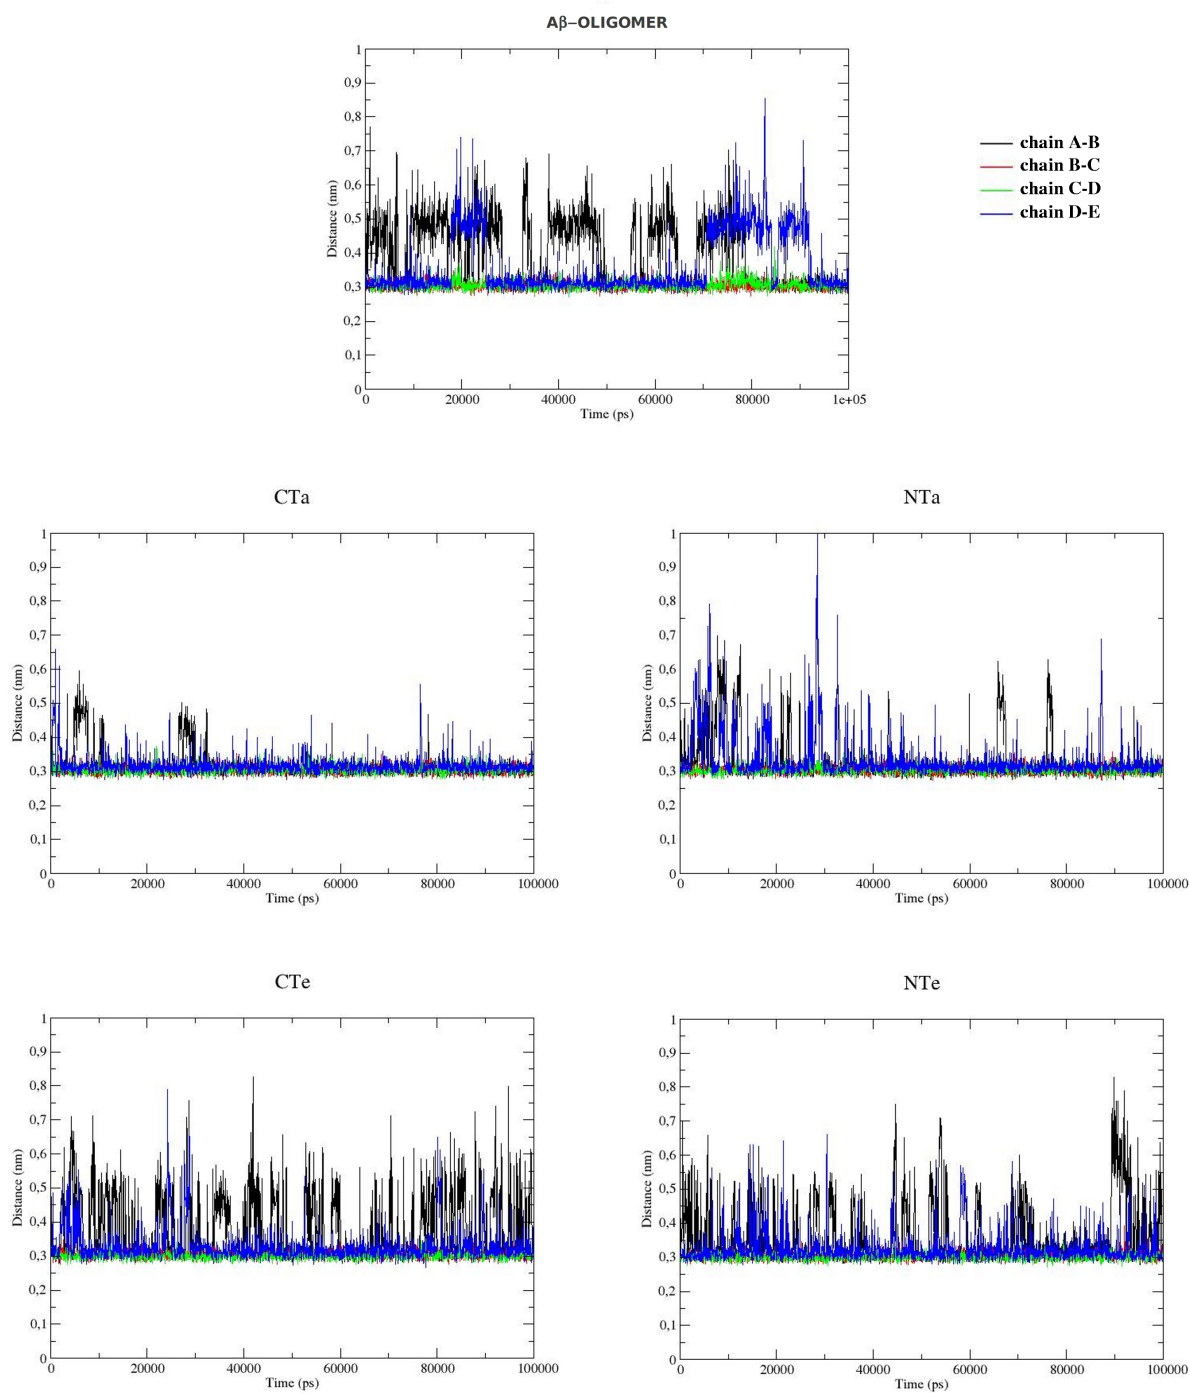

**Figure S3:** D23-K28 distances as a function of time for the all the systems.
